# Supplementary material
Source: PubMed Central journal article supplement (PMC7862416)
Supplement: NIHMS1608440-supplement-1.pdf [file NIHMS1608440-supplement-1.pdf]

## Supplemental Information

**ICD-9 Chronic Condition Data Warehouse Codes for Epilepsy:** 345, 345.0, 345.00, 345.01, 345.1, 345.10, 345.11, 345.2, 345.3, 345.4, 345.40, 345.41, 345.5, 345.50, 345.51, 345.6, 345.60, 345.61, 345.7, 345.70, 345.71, 345.8, 345.80, 345.81, 345.9, 345.90, 345.91

**ICD-10 Chronic Condition Data Warehouse Codes for Epilepsy:** G40.001, G40.009, G40.011, G40.019, G40.101, G40.109, G40.111, G40.119, G40.201, G40.209, G40.211, G40.219, G40.301, G40.309, G40.311, G40.319, G40.A01, G40.A09, G40.A11, G40.A19, G40.B01, G40.B09, G40.B11, G40.B19, G40.401, G40.409, G40.411, G40.419, G40.501, G40.509, G40.801, G40.802, G40.803, G40.804, G40.811, G40.812, G40.813, G40.814, G40.821, G40.822, G40.823, G40.824, G40.89, G40.901, G40.909, G40.911, G40.919

**Antiepileptic Drugs:** acetazolamide; adrenocorticotrophin; brivaracetam; carbamazepine; clobazam; clonazepam; diazepam; eslicarbazepine acetate; ethosuximide; everolimus; felbamate; gabapentin; lacosamide; lamotrigine; levetiracetam; lorazepam; midazolam; nitrazepam; oxcarbazepine; paraldehyde; perampanel; phenobarbital; phenytoin; piracetam; potassium bromide; pregabalin; primidone; rufinamide; sodium valproate; stiripentol ; sulthiame; tiagabine; topiramate; valproic acid; vigabatrin; zonisamide
